# Supplementary material
Source: Springer Nature journal article supplement (https://www.springermedizin.de/resource/supplementary/12936_2008_852_MOESM5_ESM.pdf/9548400)

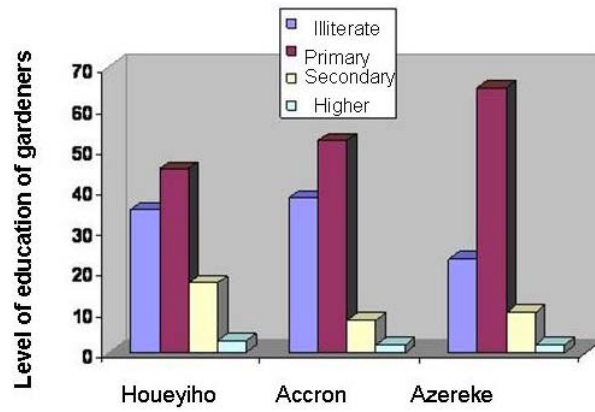

**Figure 7:** Education Level of gardeners at the three sites of study (October 2005-december 2006).

Supplement: MOESM5 [file 9548400]
